# Supplementary material for: LINE1 family member is negative regulator of HLA-G expression
Source: PubMed Central journal article supplement (PMC3510505; doi:10.1093/nar/gks874), 2012-09-21
Supplement: supp_gks874_nar-01811-v-2012-File010.pdf [file supp_gks874_nar-01811-v-2012-File010.pdf]

|       |     |                   |            |         |        |        |          |          |      |           |      |        |             |       |        |       |              |       |              |      |           |       |      |      |
|-------|-----|-------------------|------------|---------|--------|--------|----------|----------|------|-----------|------|--------|-------------|-------|--------|-------|--------------|-------|--------------|------|-----------|-------|------|------|
| L1RE1 | 1   | AAGTACCAATGACTTTC | CAAGAAATTC | CAAAAAA | CTA    | TTTAAA | TT       | CATATGGA | 59   | L1RE1     | 834  | CCCTA  | FGAGATA     | EA    | CTCTCA | CCAGT | FGAATGGCAAT  | L     | TTTTAAAAGTCA | CA   | AAAAA     | 892   |      |      |
| aL    | 1   | -----             | -----      | -----   | -----  | -----  | -----    | -----    | 1    | aL        | 267  | CACAA  | FGAGATACCAT | TT    | TTG    | CCAGT | CAGAATGGCAAT | T     | TTTTAAA      | AGT  | CAAGAAACA | 326   |      |      |
| gL    | 1   | -----             | CAAGAAATTC | CAAAAAA | CTA    | TTTAAA | TT       | CATATGGA | 41   | gL        | 812  | TCAA   | FGAGATACCAT | CT    | CTG    | CCAGT | CAGAATGGCAAT | T     | TTTTAAA      | CT   | CAAGAAACA | 869   |      |      |
| L1RE1 | 60  | CAAAAAAGAGC       | CT         | CAAT    | GC     | CAAG   | AT       | CCCTAAGC | 119  | L1RE1     | 893  | ACAGT  | FGCTGG      | CAAGG | TTG    | CGG   | GAAATAGGA    | CA    | TTTTACACT    | TT   | GGTGG     | 952   |      |      |
| aL    | 1   | -----             | -----      | -----   | -----  | -----  | -----    | -----    | 1    | aL        | 387  | AA     | FGTTT       | CAAT  | TTG    | GGA   | AGACAGT      | CA    | TTTTACACT    | TT   | GGTGG     | 386   |      |      |
| gL    | 42  | CAAAAAAGAGC       | CT         | CAAT    | GC     | CAAG   | AT       | CCCTAAGC | 101  | gL        | 870  | ACAGAT | GCTGG       | CAAGG | TTG    | CGG   | GAAATAGGA    | CA    | TTTTACACT    | TT   | GGTGG     | 929   |      |      |
| L1RE1 | 120 | CACTACCTGACTT     | AACTATACT  | CAAGGCT | CAGTAA | CA     | AAACAGCA | GGTACTG  | 179  | L1RE1     | 953  | AACT   | TTCA        | CAACT | TTG    | GGA   | AGT          | CA    | TTTCA        | CA   | GGAT      | TT    | 1006 |      |
| aL    | 1   | -----             | -----      | -----   | -----  | -----  | -----    | -----    | 1    | aL        | 446  | AA     | FGTTT       | CAAT  | TTG    | GGA   | AGACAGT      | CA    | TTTTACACT    | TT   | GGTGG     | 445   |      |      |
| gL    | 102 | GGGCTACCTGACTT    | AACTATACT  | CAAGGCT | CAGTAA | CA     | AAACAGCA | GGTACTG  | 161  | gL        | 930  | AA     | FGTTT       | CAAT  | TTG    | GGA   | AGACAGT      | CA    | TTTTACACT    | TT   | GGTGG     | 983   |      |      |
| L1RE1 | 180 | GTAC              | AAAACAG    | ATAGAT  | CAAT   | GGAA   | CAGAA    | AGAG     | CT   | CAGAAATAA | TC   | CA     | 239         | L1RE1 | 1007   | TG    | AAATACCAT    | TTG   | ACC          | CAAT | CCCAT     | TTA   | 1066 |      |
| aL    | 1   | -----             | -----      | -----   | -----  | -----  | -----    | -----    | 1    | aL        | 446  | C      | AGAAAT      | CCAT  | TTG    | ACC   | CAAT         | CCCAT | TTA          | TTA  | AAAT      | 505   |      |      |
| gL    | 162 | GTAC              | AAAACAG    | ATAGAT  | CAAT   | GGAA   | CAGAA    | AGAG     | CT   | CAGAAATAA | TC   | CA     | 221         | gL    | 984    | C     | AGAAAT       | CCAT  | TTG          | ACC  | CAAT      | CCCAT | 1043 |      |
| L1RE1 | 240 | TATCTA            | AACTA      | ATAGAT  | CAAT   | GGAA   | CAGAA    | AGAG     | CT   | CAGAAATAA | TC   | CA     | 299         | L1RE1 | 1067   | CAT   | CTE          | CA    | ATAA         | GACA | CT        | AT    | 1126 |      |
| aL    | 1   | -----             | -----      | -----   | -----  | -----  | -----    | -----    | 1    | aL        | 506  | C      | ATTCT       | TATAA | AGACAT | GCAT  | GT           | TT    | CA           | TT   | CA        | 565   |      |      |
| gL    | 222 | CATCTA            | AACTA      | ATAGAT  | CAAT   | GGAA   | CAGAA    | AGAG     | CT   | CAGAAATAA | TC   | CA     | 281         | gL    | 1044   | C     | ATTCT        | TATAA | AGACAT       | GCAT | GT        | TT    | 1103 |      |
| L1RE1 | 300 | CTATT             | TAA        | AAATGG  | TCTGG  | GA     | AACTGG   | TAG      | CT   | AT        | AG   | AAA    | CT          | GAA   | AACT   | GGA   | 359          | L1RE1 | 1127         | AG   | AC        | TT    | 1186 |      |
| aL    | 1   | -----             | -----      | -----   | -----  | -----  | -----    | -----    | 1    | aL        | 566  | AG     | AC          | TT    | GA     | AACT  | GGA          | 625   | L1RE1        | 1127 | AG        | AC    | TT   | 1186 |
| gL    | 282 | CTATT             | TAA        | AAATGG  | TCTGG  | GA     | AACTGG   | TAG      | CT   | AT        | AG   | AAA    | CT          | GAA   | AACT   | GGA   | 341          | gL    | 1104         | AG   | AC        | TT    | 1163 |      |
| L1RE1 | 360 | TCCTT             | CCTAC      | ACTT    | TA     | CAAAA  | AA       | TT       | AGAT | GGAT      | TAA  | GA     | TT          | AAA   | TT     | AAA   | 419          | L1RE1 | 1187         | F    | A         | T     | 1246 |      |
| aL    | 1   | -----             | -----      | -----   | -----  | -----  | -----    | -----    | 1    | aL        | 626  | F      | A           | T     | AC     | CA    | T            | 745   | L1RE1        | 1187 | F         | A     | T    | 1246 |
| gL    | 342 | CTCTT             | CCTAC      | ACTT    | TA     | CAAAA  | AA       | TT       | AGAT | GGAT      | TAA  | GA     | TT          | AAA   | TT     | AAA   | 401          | gL    | 1164         | F    | A         | T     | 1223 |      |
| L1RE1 | 420 | AC                | CA         | AAA     | CT     | TA     | AAAA     | CC       | TT   | GA        | AAAA | CT     | AG          | CA    | TT     | AC    | CA           | 479   | L1RE1        | 1247 | C         | T     | 1306 |      |
| aL    | 1   | -----             | -----      | -----   | -----  | -----  | -----    | -----    | 1    | aL        | 686  | F      | A           | T     | AG     | GA    | AG           | 745   | L1RE1        | 1247 | C         | T     | 1306 |      |
| gL    | 402 | TC                | CA         | AAA     | CT     | TA     | AAAA     | CC       | TT   | GA        | AAAA | CT     | AG          | CA    | TT     | AC    | CA           | 461   | gL           | 1224 | F         | A     | 1283 |      |
| L1RE1 | 480 | GGC               | AA         | GA      | TT     | AT     | GC       | AAAA     | CT   | CA        | AAAG | CA     | AA          | TT    | G      | CA    | AA           | 539   | L1RE1        | 1307 | A         | C     | 1366 |      |
| aL    | 1   | -----             | -----      | -----   | -----  | -----  | -----    | -----    | 1    | aL        | 746  | A      | C           | CA    | AT     | GT    | T            | 805   | L1RE1        | 1307 | A         | C     | 1366 |      |
| gL    | 462 | GGC               | AA         | GA      | TT     | AT     | GC       | AAAA     | CT   | CA        | AAAG | CA     | AA          | TT    | G      | CA    | AA           | 521   | gL           | 1284 | A         | C     | 1343 |      |
| L1RE1 | 540 | ATGG              | GAT        | CTA     | AT     | TAA    | CT       | AAAG     | AG   | CT        | T    | CT     | GC          | AC    | AG     | AA    | AA           | 595   | L1RE1        | 1367 | G         | G     | 1424 |      |
| aL    | 1   | -----             | -----      | -----   | -----  | -----  | -----    | -----    | 1    | aL        | 806  | G      | G           | AA    | CA     | CA    | CA           | 865   | L1RE1        | 1367 | G         | G     | 1424 |      |
| gL    | 522 | ATGG              | GAT        | CTA     | AT     | TAA    | CT       | AAAG     | AG   | CT        | T    | CT     | GC          | AC    | AG     | AA    | AA           | 577   | gL           | 1344 | G         | G     | 1403 |      |
| L1RE1 | 596 | TG                | AAC        | AG      | CA     | CT     | TA       | CA       | AT   | GG        | GA   | AA     | AA          | TT    | T      | T     | GC           | 655   | L1RE1        | 1425 | G         | G     | 1473 |      |
| aL    | 36  | TG                | AAC        | AG      | CA     | CT     | TA       | CA       | AT   | GG        | GA   | AA     | AA          | TT    | T      | T     | GC           | 149   | L1RE1        | 1425 | G         | G     | 1473 |      |
| gL    | 578 | TG                | AAC        | AG      | CA     | CT     | TA       | CA       | AT   | GG        | GA   | AA     | AA          | TT    | T      | T     | GC           | 637   | aL           | 866  | A         | T     | 925  |      |
| L1RE1 | 656 | AA                | T          | A       | T      | A      | GA       | A        | T    | C         | A    | A      | A           | A     | A      | A     | A            | 715   | L1RE1        | 1474 | C         | A     | 1533 |      |
| aL    | 96  | AA                | T          | A       | GA     | A      | T        | C        | A    | A         | A    | A      | A           | A     | A      | A     | A            | 149   | aL           | 926  | C         | A     | 985  |      |
| gL    | 638 | AA                | T          | A       | GA     | A      | T        | C        | A    | A         | A    | A      | A           | A     | A      | A     | A            | 693   | gL           | 1464 | C         | A     | 1523 |      |
| L1RE1 | 716 | TT                | AAAA       | AG      | TGG    | CA     | AA       | AG       | CA   | T         | GA   | AG     | CA          | CT    | TT     | CA    | AAAA         | 775   | L1RE1        | 1534 | CA        | CA    | 1570 |      |
| aL    | 150 | TT                | AAAA       | AG      | TGG    | CA     | AA       | AG       | CA   | T         | GA   | AG     | CA          | CT    | TT     | CA    | AAAA         | 207   | aL           | 986  | CA        | CA    | 1005 |      |
| gL    | 694 | TT                | AAAA       | AG      | TGG    | CA     | AA       | AG       | CA   | T         | GA   | AG     | CA          | CT    | TT     | CA    | AAAA         | 753   | gL           | 1524 | CA        | CA    | 1553 |      |
| L1RE1 | 776 | AA                | AA         | CA      | AT     | GA     | AA       | AA       | AA   | AA        | AA   | AA     | AA          | AA    | AA     | AA    | AA           | 833   | L1RE1        | 1534 | CA        | CA    | 1570 |      |
| aL    | 208 | AA                | AA         | CA      | AT     | GA     | AA       | AA       | AA   | AA        | AA   | AA     | AA          | AA    | AA     | AA    | AA           | 266   | aL           | 986  | CA        | CA    | 1005 |      |
| gL    | 754 | AA                | AA         | CA      | AT     | GA     | AA       | AA       | AA   | AA        | AA   | AA     | AA          | AA    | AA     | AA    | AA           | 811   | gL           | 1524 | CA        | CA    | 1553 |      |

### Supplementary Figure 1. Sequence alignment of LINE1 segments.

Alignment of a segment of the L1RE1 (1570 bp), gL (1553 bp), and aL (1005 bp) sequences. Homologous bases are enclosed by frames. Potential hairpin loops (probability above 80%) are shown as bars (black: stem, gray:loop). CpG sequences are shown as small black circles. Small arrows are position for distinguishing Ta and non-Ta subfamilies.

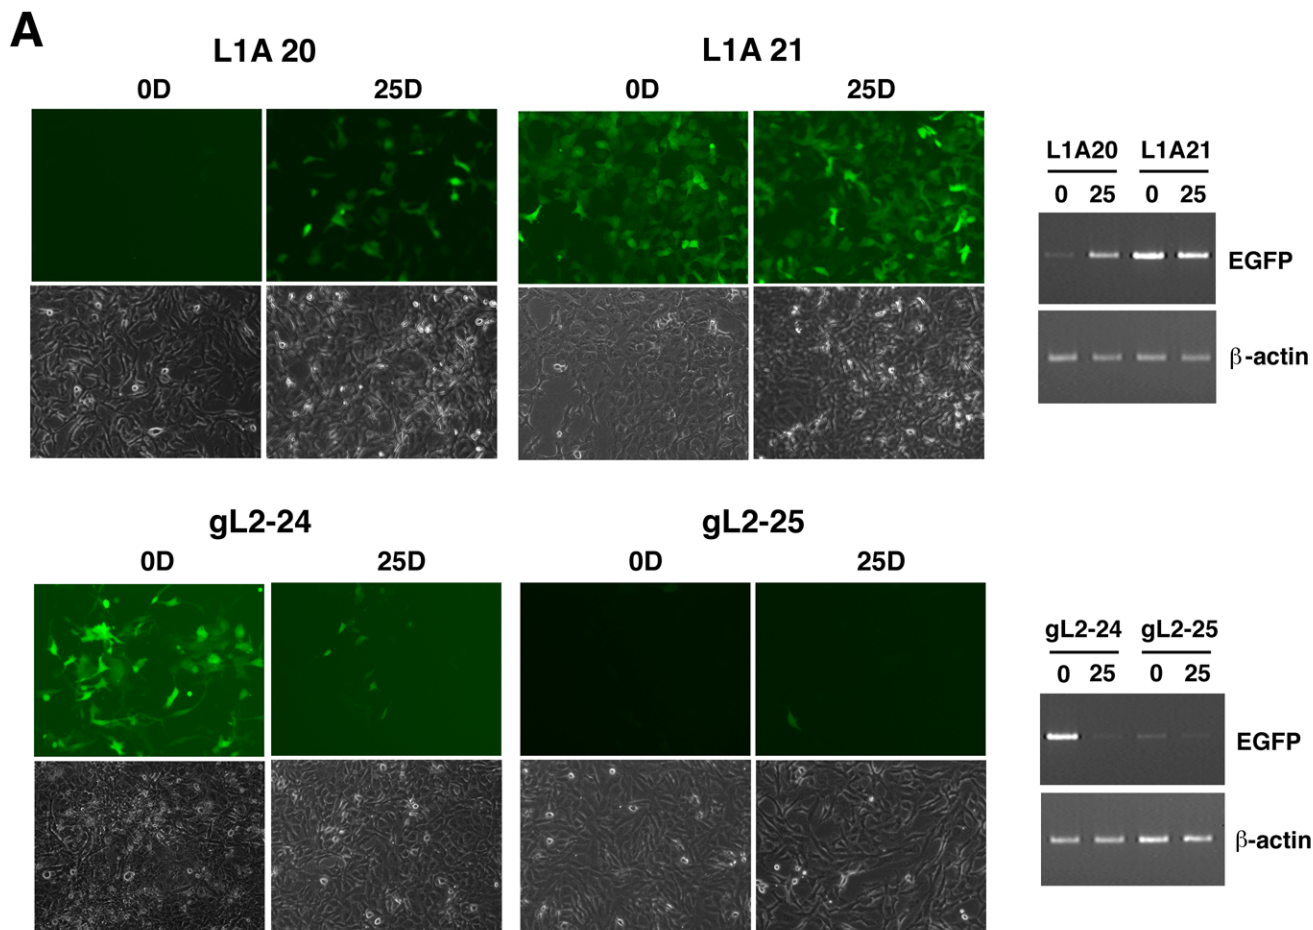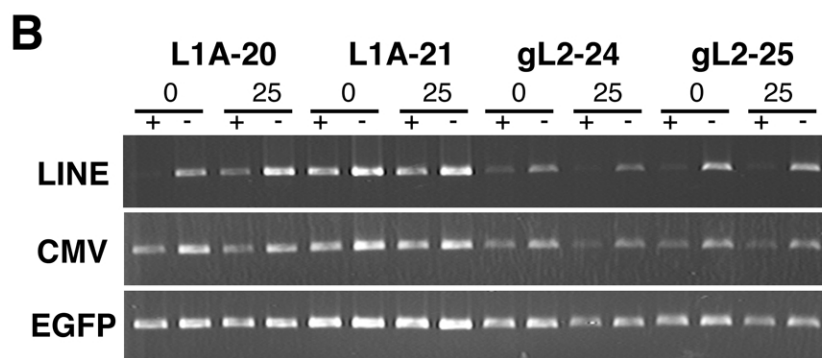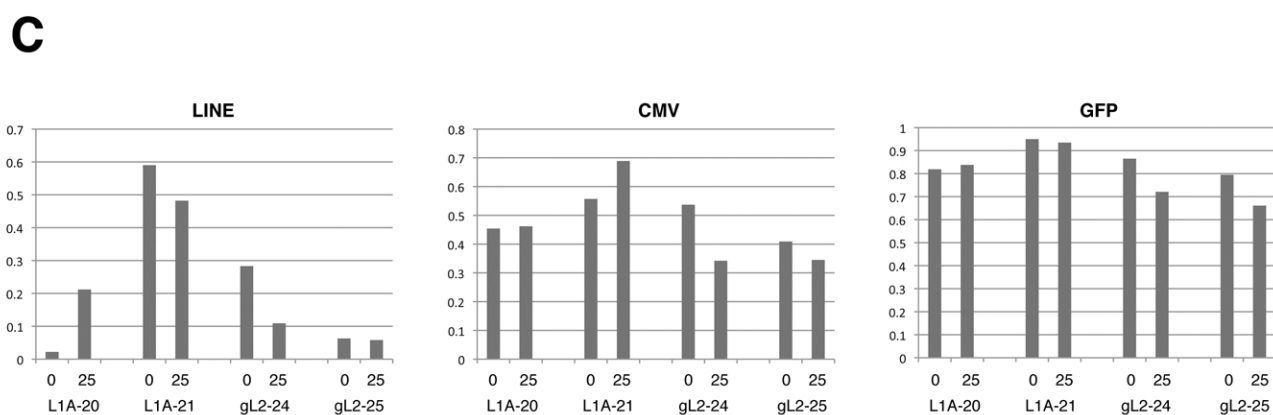

**Supplementary Figure 2. Correlation of EGFP expression and MBN score after cell culturing.**

(A) EGFP expression levels (imaging of fluorescence, left; RT-PCR, right) were compared before and after 25 days of culturing cell lines L1A-20, L1A-21, gL2-24, and gL2-25. (B) Genomic DNA harvested before or after 25 days of cell culture (lines L1A-20, L1A-21, gL2-24, and gL2-25) was cleaved with MBN (+), then amplified with primers targeting the LINE elements (gL2 and L1A), the CMV promoter, and the EGFP sequence. (C) Histograms of the ratios (MBN +/-) of PCR products.
